# Supplementary material for: Reducing uncertainty in simulation estimates of the surface tension through a two-scale finite-size analysis: thicker is better
Source: Royal Society of Chemistry journal article supplement (doi:10.1039/c9ra07058c), 2019-01-01
Supplement: c9ra07058c1.pdf [file c9ra07058c1.pdf]

## Reducing Uncertainty in Simulation Estimates of the Surface Tension Through a Two-Scale Finite-Size Analysis: Thicker is Better

José L. Rivera<sup>a,\*</sup> and Jack F. Douglas<sup>b</sup>

<sup>a</sup>Laboratorio de Modelamiento y Simulación Molecular, Universidad Michoacana  
de San Nicolás de Hidalgo, Morelia, Michoacán 58000, México

<sup>b</sup>Materials Science and Engineering Division, National Institute of Standards and Technology,  
Gaithersburg, Maryland 20899, USA

### Supplemental Information

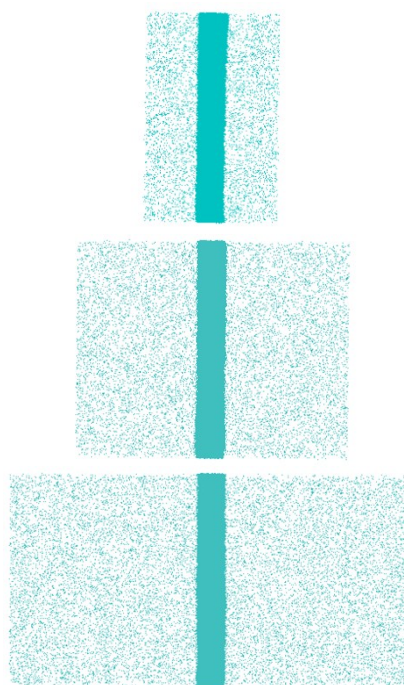

**Figure S1.** Orthogonal projection of a snapshot of the central cells used to simulate large bulk vapor in thermodynamic equilibrium with a liquid layer at 11 ns of simulation time. The length of the simulation cells in the homogeneous directions (parallel to the interface) are 150.4 in reduced units. The simulation cells have dimensions in the inhomogeneous directions of 96 (top), 192 (central), and 288 (bottom). Each sphere represents a Lennard-Jones atom at a reduced temperature of 0.72.

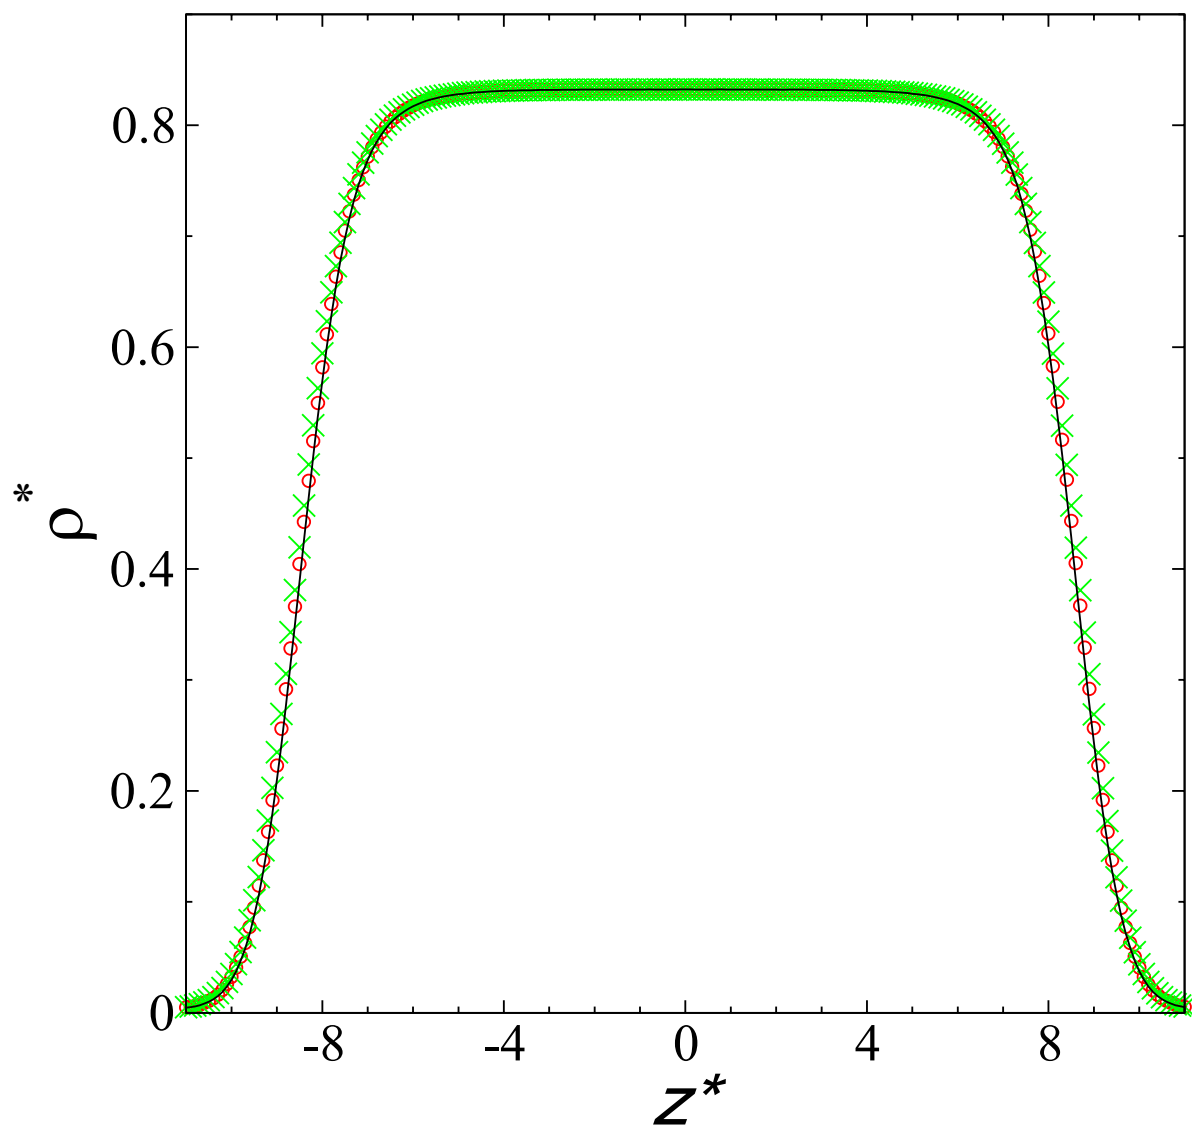

**Figure S2.** Reduced density profiles as a function of the position in the inhomogeneous direction of the simulation cell. The profiles represent average profiles over 10 ns. The systems are composed of Lennard-Jones atoms at a reduced temperature of 0.72 and reduced thicknesses of  $\approx 16.8$ . The black line, the red circles, and the green crosses correspond to simulated systems using reduced lengths of the simulation box in the homogeneous direction of 96, 192 and 288, respectively. The lengths of the simulation box in the tangential direction is 150.4.

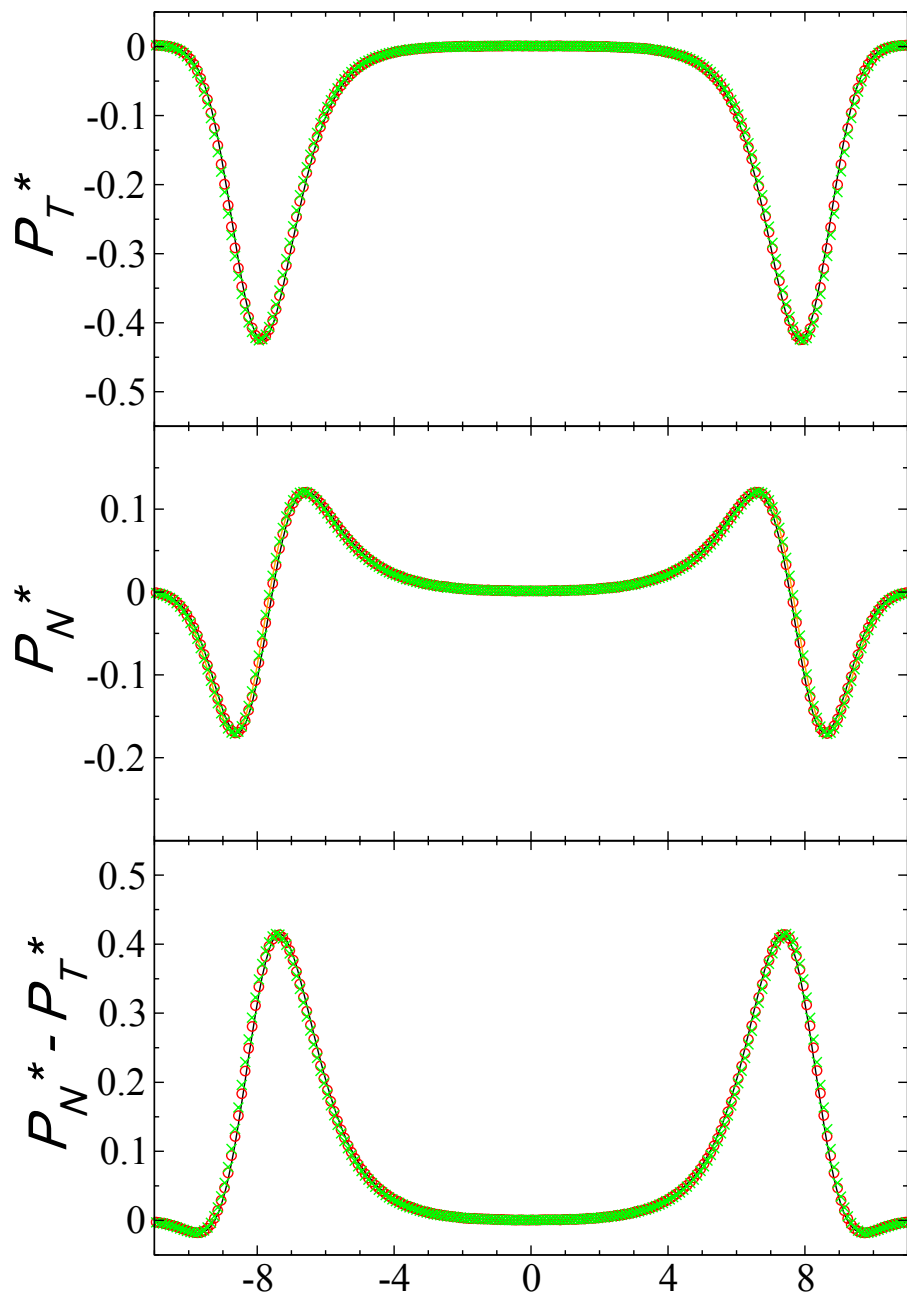

**Figure S3.** Average tangential (top) and normal (center) pressure profiles, and the differences between them (bottom). The systems are composed of Lennard-Jones atoms at a reduced temperature of 0.72 and reduced thicknesses of  $\approx 16.8$ . The black line, the red circles, and the green crosses correspond to simulated systems using reduced lengths of the simulation box in the homogeneous direction of 96, 192 and 288, respectively. The lengths of the simulation box in the tangential direction is 150.4.
